# Supplementary material for: Proposition of electronic waste as a reference material – part 1: sample preparation, characterization and chemometric evaluation
Source: Royal Society of Chemistry journal article supplement (doi:10.1039/c9ja00283a), 2019-01-01

**Proposition of electronic waste as a reference material - Part 1: sample preparation,  
characterization and chemometric evaluation**

Daniel Fernandes Andrade<sup>a</sup>, Raquel Cardoso Machado<sup>a</sup>, Márcio Arruda Bacchi<sup>b</sup> and  
Edenir Rodrigues Pereira-Filho<sup>a,\*</sup>

<sup>a</sup>Group of Applied Instrumental Analysis, Department of Chemistry, Federal University  
of São Carlos, Rod Washington Luiz, km 235, Zip code 13565-905, São Carlos, SP, Brazil

<sup>b</sup>Center of Nuclear Energy in Agriculture (CENA), University of São Paulo, Av  
Centenário 303, Zip code 13416-000, Piracicaba, SP, Brazil

\*Corresponding author: Group of Applied Instrumental Analysis, Department of  
Chemistry, Federal University of São Carlos, São Carlos, São Paulo State, 13565-905,  
Brazil

Phone number: +55 16 3351-8092

E-mail: erpf@ufscar.br (E.R. Pereira-Filho)

## Supplementary Information

**Table S1** Concentrations (mg kg<sup>-1</sup>) determined from the factorial design experiments by ICP OES.

| Experiment | Reagent | Ag  | Al    | As    | Au  | Ba   | Cr    | Cu     | Fe     | Ni    | Pb    | Sb   | Si    | Sn    | Zn    |
|------------|---------|-----|-------|-------|-----|------|-------|--------|--------|-------|-------|------|-------|-------|-------|
| 1a         | AR      | 738 | 59282 | 36    | 127 | 5433 | 3055  | 92036  | 47339  | 3903  | 8586  | 7103 | 15059 | 28950 | 18864 |
| 2a         | AR      | 254 | 66512 | 33    | 169 | 5195 | 5811  | 168352 | 77722  | 5011  | 9627  | 5649 | 3436  | 35314 | 13900 |
| 3a         | AR      | 734 | 66832 | 29    | 94  | 5374 | 5227  | 217458 | 90216  | 5286  | 9010  | 5934 | 25708 | 38853 | 28864 |
| 4a         | AR      | 476 | 49653 | 39    | 188 | 4548 | 3253  | 135374 | 58136  | 4270  | 8711  | 5799 | 5598  | 26657 | 12837 |
| 5a         | AR      | 668 | 51872 | 37    | 155 | 5167 | 5176  | 127048 | 65911  | 4619  | 9312  | 5999 | 7042  | 26776 | 18077 |
| 6a         | AR      | 660 | 43641 | 32    | 185 | 4378 | 3527  | 158309 | 68688  | 4183  | 9863  | 5090 | 6444  | 26050 | 22145 |
| 7a         | AR      | 704 | 56597 | 41    | 172 | 5151 | 3519  | 116793 | 53514  | 4002  | 9115  | 6966 | 7706  | 26247 | 16526 |
| 1b         | ARI     | 44  | 39164 | < LOQ | 209 | 8472 | 2876  | 124061 | 78929  | 3457  | 8132  | 4495 | 3825  | 21478 | 20654 |
| 2b         | ARI     | 7   | 36061 | 18    | 205 | 6679 | 3180  | 138942 | 61191  | 3681  | 8969  | 729  | 940   | 24027 | 22365 |
| 3b         | ARI     | 52  | 36861 | 12    | 200 | 6260 | 5483  | 169798 | 65557  | 4738  | 8383  | 4308 | 3416  | 25720 | 38359 |
| 4b         | ARI     | 20  | 39418 | 16    | 205 | 6371 | 5089  | 154572 | 84271  | 4463  | 8247  | 3649 | 1445  | 25292 | 26021 |
| 5b         | ARI     | 19  | 40114 | 14    | 161 | 8212 | 3564  | 153238 | 63777  | 4054  | 10189 | 4071 | 2167  | 25566 | 32983 |
| 6b         | ARI     | 27  | 39384 | 13    | 186 | 6951 | 4310  | 117882 | 59824  | 3882  | 8974  | 4571 | 1938  | 24257 | 18871 |
| 7b         | ARI     | 30  | 35967 | 9     | 140 | 6078 | 3622  | 156381 | 85594  | 4108  | 9358  | 4149 | 1946  | 25572 | 27354 |
| 1c         | AR 50%  | 656 | 60860 | 30    | 372 | 5012 | 22785 | 218056 | 136438 | 12175 | 12366 | 6475 | 30173 | 30038 | 23141 |
| 2c         | AR 50%  | 168 | 66386 | 34    | 193 | 4771 | 5022  | 229192 | 84572  | 4889  | 14476 | 5616 | 4617  | 40561 | 39367 |
| 3c         | AR 50%  | 843 | 70007 | 32    | 241 | 5318 | 4446  | 155806 | 78802  | 5066  | 13994 | 6999 | 36141 | 35164 | 18593 |
| 4c         | AR 50%  | 419 | 64590 | 36    | 203 | 4891 | 6238  | 234169 | 92908  | 5250  | 13623 | 5763 | 7441  | 38781 | 34400 |
| 5c         | AR 50%  | 436 | 51991 | 32    | 227 | 3816 | 2757  | 96916  | 43300  | 3614  | 9333  | 5792 | 7948  | 23538 | 14270 |
| 6c         | AR 50%  | 422 | 49773 | 31    | 190 | 4191 | 4955  | 189693 | 69458  | 4441  | 11702 | 5439 | 9274  | 30586 | 25288 |
| 7c         | AR 50%  | 459 | 58874 | 35    | 197 | 4547 | 3593  | 169081 | 64160  | 3872  | 13228 | 5866 | 9041  | 34360 | 27223 |

**Table S1** Continuation.

| Experiment | Reagent              | Ag    | Al    | As    | Au  | Ba    | Cr   | Cu     | Fe    | Ni   | Pb   | Sb    | Si    | Sn   | Zn    |
|------------|----------------------|-------|-------|-------|-----|-------|------|--------|-------|------|------|-------|-------|------|-------|
| 1d         | HNO <sub>3</sub> 50% | < LOQ | 29040 | < LOQ | 196 | 4807  | 3446 | 137876 | 71169 | 3485 | 7123 | < LOQ | 13339 | 1295 | 28570 |
| 2d         | HNO <sub>3</sub> 50% | < LOQ | 27532 | < LOQ | 131 | 4155  | 1402 | 127370 | 28530 | 2021 | 6630 | < LOQ | 2674  | 511  | 31647 |
| 3d         | HNO <sub>3</sub> 50% | < LOQ | 48951 | < LOQ | 210 | 6611  | 5    | 122662 | 65188 | 3688 | 9845 | 203   | 23065 | 2355 | 19904 |
| 4d         | HNO <sub>3</sub> 50% | < LOQ | 18039 | < LOQ | 205 | 5588  | 3552 | 173633 | 57731 | 3485 | 8632 | 270   | 4888  | 2321 | 28608 |
| 5d         | HNO <sub>3</sub> 50% | < LOQ | 36088 | < LOQ | 223 | 5394  | 2958 | 179490 | 45913 | 3968 | 8643 | 32    | 7253  | 1426 | 31305 |
| 6d         | HNO <sub>3</sub> 50% | < LOQ | 39037 | < LOQ | 184 | 5355  | 3851 | 176475 | 77140 | 4764 | 8451 | 50    | 7799  | 1907 | 35884 |
| 7d         | HNO <sub>3</sub> 50% | < LOQ | 36543 | < LOQ | 189 | 5544  | 4157 | 178966 | 68708 | 4070 | 8620 | 316   | 7954  | 3804 | 27294 |
| 1e         | HNO <sub>3</sub>     | < LOQ | 31988 | < LOQ | 204 | 6071  | 3870 | 148056 | 57901 | 3594 | 9701 | < LOQ | 2710  | 1766 | 27649 |
| 2e         | HNO <sub>3</sub>     | < LOQ | 33284 | < LOQ | 149 | 5900  | 5767 | 160031 | 81338 | 4422 | 9179 | 343   | 757   | 3867 | 24286 |
| 3e         | HNO <sub>3</sub>     | < LOQ | 37443 | < LOQ | 266 | 6934  | 4088 | 190760 | 61777 | 3984 | 9811 | < LOQ | 3243  | 1395 | 25435 |
| 4e         | HNO <sub>3</sub>     | < LOQ | 34572 | < LOQ | 196 | < LOQ | 4300 | 150820 | 70668 | 4270 | 8974 | 107   | 930   | 2124 | 28180 |
| 5e         | HNO <sub>3</sub>     | < LOQ | 32179 | < LOQ | 161 | 7523  | 4711 | 141655 | 58724 | 4509 | 9615 | < LOQ | 985   | 1692 | 22338 |
| 6e         | HNO <sub>3</sub>     | < LOQ | 35105 | < LOQ | 268 | 6363  | 4110 | 170363 | 63545 | 4598 | 9887 | 52    | 1223  | 1903 | 23190 |
| 7e         | HNO <sub>3</sub>     | < LOQ | 32996 | < LOQ | 121 | 6818  | 6048 | 137601 | 74419 | 6171 | 9144 | 64    | 1213  | 2333 | 22508 |

LOQ - Limit of quantification for HNO<sub>3</sub>: 0.04 mg kg<sup>-1</sup> Ag; 0.05 mg kg<sup>-1</sup> As; 1.07 mg kg<sup>-1</sup> Ba; 0.64 mg kg<sup>-1</sup> Sb.

LOQ - Limit of quantification for ARI: 0.22 mg kg<sup>-1</sup> As

**Table S2** Codded values ( $d_i$  and  $D$ ) for concentrations determined from the factorial design experiments by ICP OES.

| Experiment | Reagent | Ag     | Al     | As     | Au     | Ba     | Cr     | Cu     | Fe     | Ni     | Pb     | Sb     | Si     | Sn     | Zn     | D      |
|------------|---------|--------|--------|--------|--------|--------|--------|--------|--------|--------|--------|--------|--------|--------|--------|--------|
| 1a         | AR      | 0.8758 | 0.7936 | 0.8795 | 0.1165 | 0.6413 | 0.1339 | 0.0000 | 0.1743 | 0.1854 | 0.2493 | 1.0000 | 0.4042 | 0.7101 | 0.2272 | 0.0000 |
| 2a         | AR      | 0.3010 | 0.9328 | 0.8202 | 0.2673 | 0.6132 | 0.2549 | 0.5369 | 0.4559 | 0.2945 | 0.3820 | 0.7954 | 0.0757 | 0.8690 | 0.0401 | 0.3574 |
| 3a         | AR      | 0.8711 | 0.9389 | 0.7043 | 0.0000 | 0.6343 | 0.2293 | 0.8824 | 0.5717 | 0.3216 | 0.3034 | 0.8355 | 0.7051 | 0.9573 | 0.6041 | 0.0000 |
| 4a         | AR      | 0.5650 | 0.6083 | 0.9535 | 0.3379 | 0.5368 | 0.1426 | 0.3049 | 0.2744 | 0.2215 | 0.2652 | 0.8164 | 0.1368 | 0.6528 | 0.0000 | 0.0000 |
| 5a         | AR      | 0.7919 | 0.6510 | 0.9063 | 0.2199 | 0.6099 | 0.2270 | 0.2463 | 0.3464 | 0.2559 | 0.3419 | 0.8447 | 0.1776 | 0.6558 | 0.1975 | 0.3926 |
| 6a         | AR      | 0.7825 | 0.4926 | 0.7759 | 0.3258 | 0.5167 | 0.1546 | 0.4663 | 0.3722 | 0.2129 | 0.4121 | 0.7167 | 0.1607 | 0.6377 | 0.3508 | 0.4037 |
| 7a         | AR      | 0.8356 | 0.7420 | 1.0000 | 0.2802 | 0.6080 | 0.1543 | 0.1742 | 0.2315 | 0.1952 | 0.3167 | 0.9808 | 0.1964 | 0.6426 | 0.1390 | 0.3633 |
| 1b         | ARI     | 0.0517 | 0.4065 | 0.0000 | 0.4136 | 1.0000 | 0.1260 | 0.2253 | 0.4671 | 0.1415 | 0.1914 | 0.6329 | 0.0867 | 0.5235 | 0.2946 | 0.0000 |
| 2b         | ARI     | 0.0080 | 0.3468 | 0.4344 | 0.3979 | 0.7884 | 0.1394 | 0.3300 | 0.3027 | 0.1635 | 0.2981 | 0.1026 | 0.0052 | 0.5872 | 0.3591 | 0.0000 |
| 3b         | ARI     | 0.0620 | 0.3622 | 0.2972 | 0.3815 | 0.7388 | 0.2405 | 0.5471 | 0.3431 | 0.2676 | 0.2234 | 0.6066 | 0.0751 | 0.6294 | 0.9620 | 0.3374 |
| 4b         | ARI     | 0.0237 | 0.4114 | 0.3937 | 0.3976 | 0.7519 | 0.2232 | 0.4400 | 0.5166 | 0.2405 | 0.2061 | 0.5137 | 0.0194 | 0.6188 | 0.4969 | 0.2683 |
| 5b         | ARI     | 0.0228 | 0.4248 | 0.3526 | 0.2389 | 0.9693 | 0.1562 | 0.4306 | 0.3266 | 0.2003 | 0.4536 | 0.5732 | 0.0399 | 0.6256 | 0.7594 | 0.2805 |
| 6b         | ARI     | 0.0320 | 0.4107 | 0.3193 | 0.3313 | 0.8204 | 0.1890 | 0.1818 | 0.2900 | 0.1833 | 0.2988 | 0.6435 | 0.0334 | 0.5929 | 0.2274 | 0.2270 |
| 7b         | ARI     | 0.0356 | 0.3450 | 0.2308 | 0.1635 | 0.7174 | 0.1588 | 0.4527 | 0.5288 | 0.2056 | 0.3477 | 0.5841 | 0.0336 | 0.6257 | 0.5472 | 0.2591 |
| 1c         | AR 50%  | 0.7787 | 0.8240 | 0.7495 | 1.0000 | 0.5916 | 1.0000 | 0.8866 | 1.0000 | 1.0000 | 0.7311 | 0.9117 | 0.8313 | 0.7373 | 0.3884 | 0.7946 |
| 2c         | AR 50%  | 0.1992 | 0.9303 | 0.8430 | 0.3555 | 0.5631 | 0.2202 | 0.9650 | 0.5193 | 0.2825 | 1.0000 | 0.7908 | 0.1091 | 1.0000 | 1.0000 | 0.5116 |
| 3c         | AR 50%  | 1.0000 | 1.0000 | 0.7764 | 0.5280 | 0.6277 | 0.1950 | 0.4487 | 0.4659 | 0.2999 | 0.9386 | 0.9855 | 1.0000 | 0.8652 | 0.2170 | 0.5847 |
| 4c         | AR 50%  | 0.4973 | 0.8958 | 0.8921 | 0.3916 | 0.5773 | 0.2736 | 1.0000 | 0.5966 | 0.3180 | 0.8914 | 0.8113 | 0.1889 | 0.9556 | 0.8128 | 0.5806 |
| 5c         | AR 50%  | 0.5169 | 0.6533 | 0.7974 | 0.4756 | 0.4504 | 0.1208 | 0.0343 | 0.1369 | 0.1569 | 0.3445 | 0.8155 | 0.2032 | 0.5750 | 0.0540 | 0.2665 |
| 6c         | AR 50%  | 0.5004 | 0.6107 | 0.7586 | 0.3454 | 0.4947 | 0.2173 | 0.6871 | 0.3793 | 0.2384 | 0.6465 | 0.7658 | 0.2407 | 0.7509 | 0.4693 | 0.4655 |
| 7c         | AR 50%  | 0.5447 | 0.7858 | 0.8525 | 0.3704 | 0.5367 | 0.1575 | 0.5421 | 0.3302 | 0.1823 | 0.8410 | 0.8259 | 0.2341 | 0.8452 | 0.5422 | 0.4727 |

**Table S2** Continuation.

| <b>Experiment</b> | <b>Reagent</b>       | <b>Ag</b> | <b>Al</b> | <b>As</b> | <b>Au</b> | <b>Ba</b> | <b>Cr</b> | <b>Cu</b> | <b>Fe</b> | <b>Ni</b> | <b>Pb</b> | <b>Sb</b> | <b>Si</b> | <b>Sn</b> | <b>Zn</b> | <b>D</b> |
|-------------------|----------------------|-----------|-----------|-----------|-----------|-----------|-----------|-----------|-----------|-----------|-----------|-----------|-----------|-----------|-----------|----------|
| 1d                | HNO <sub>3</sub> 50% | 0.0000    | 0.2117    | 0.0000    | 0.3659    | 0.5674    | 0.1511    | 0.3225    | 0.3951    | 0.1443    | 0.0629    | 0.0000    | 0.3556    | 0.0196    | 0.5930    | 0.0000   |
| 2d                | HNO <sub>3</sub> 50% | 0.0000    | 0.1827    | 0.0000    | 0.1325    | 0.4905    | 0.0613    | 0.2486    | 0.0000    | 0.0000    | 0.0000    | 0.0000    | 0.0542    | 0.0000    | 0.7090    | 0.0000   |
| 3d                | HNO <sub>3</sub> 50% | 0.0000    | 0.5948    | 0.0000    | 0.4179    | 0.7803    | 0.0000    | 0.2155    | 0.3397    | 0.1642    | 0.4098    | 0.0286    | 0.6305    | 0.0461    | 0.2664    | 0.0000   |
| 4d                | HNO <sub>3</sub> 50% | 0.0000    | 0.0000    | 0.0000    | 0.3979    | 0.6595    | 0.1557    | 0.5741    | 0.2706    | 0.1442    | 0.2552    | 0.0380    | 0.1167    | 0.0452    | 0.5945    | 0.0000   |
| 5d                | HNO <sub>3</sub> 50% | 0.0000    | 0.3473    | 0.0000    | 0.4635    | 0.6367    | 0.1296    | 0.6153    | 0.1611    | 0.1918    | 0.2566    | 0.0045    | 0.1836    | 0.0229    | 0.6961    | 0.0000   |
| 6d                | HNO <sub>3</sub> 50% | 0.0000    | 0.4041    | 0.0000    | 0.3238    | 0.6321    | 0.1688    | 0.5941    | 0.4505    | 0.2701    | 0.2321    | 0.0071    | 0.1990    | 0.0348    | 0.8687    | 0.0000   |
| 7d                | HNO <sub>3</sub> 50% | 0.0000    | 0.3561    | 0.0000    | 0.3390    | 0.6543    | 0.1823    | 0.6116    | 0.3723    | 0.2018    | 0.2537    | 0.0445    | 0.2034    | 0.0822    | 0.5449    | 0.0000   |
| 1e                | HNO <sub>3</sub>     | 0.0000    | 0.2684    | 0.0000    | 0.3962    | 0.7166    | 0.1697    | 0.3941    | 0.2722    | 0.1549    | 0.3915    | 0.0000    | 0.0552    | 0.0313    | 0.5583    | 0.0000   |
| 2e                | HNO <sub>3</sub>     | 0.0000    | 0.2933    | 0.0000    | 0.1959    | 0.6964    | 0.2530    | 0.4784    | 0.4894    | 0.2364    | 0.3248    | 0.0482    | 0.0000    | 0.0838    | 0.4315    | 0.0000   |
| 3e                | HNO <sub>3</sub>     | 0.0000    | 0.3734    | 0.0000    | 0.6177    | 0.8185    | 0.1792    | 0.6946    | 0.3081    | 0.1933    | 0.4054    | 0.0000    | 0.0703    | 0.0221    | 0.4748    | 0.0000   |
| 4e                | HNO <sub>3</sub>     | 0.0000    | 0.3181    | 0.0000    | 0.3671    | 0.0000    | 0.1885    | 0.4136    | 0.3905    | 0.2215    | 0.2988    | 0.0151    | 0.0049    | 0.0403    | 0.5783    | 0.0000   |
| 5e                | HNO <sub>3</sub>     | 0.0000    | 0.2721    | 0.0000    | 0.2398    | 0.8879    | 0.2066    | 0.3491    | 0.2798    | 0.2451    | 0.3805    | 0.0000    | 0.0064    | 0.0295    | 0.3581    | 0.0000   |
| 6e                | HNO <sub>3</sub>     | 0.0000    | 0.3284    | 0.0000    | 0.6238    | 0.7510    | 0.1802    | 0.5511    | 0.3245    | 0.2538    | 0.4151    | 0.0074    | 0.0131    | 0.0348    | 0.3902    | 0.0000   |
| 7e                | HNO <sub>3</sub>     | 0.0000    | 0.2878    | 0.0000    | 0.0963    | 0.8048    | 0.2653    | 0.3206    | 0.4253    | 0.4087    | 0.3204    | 0.0090    | 0.0129    | 0.0455    | 0.3645    | 0.0000   |

**Figure S1** Surface plot for optimized condition using aqua regia (AR).

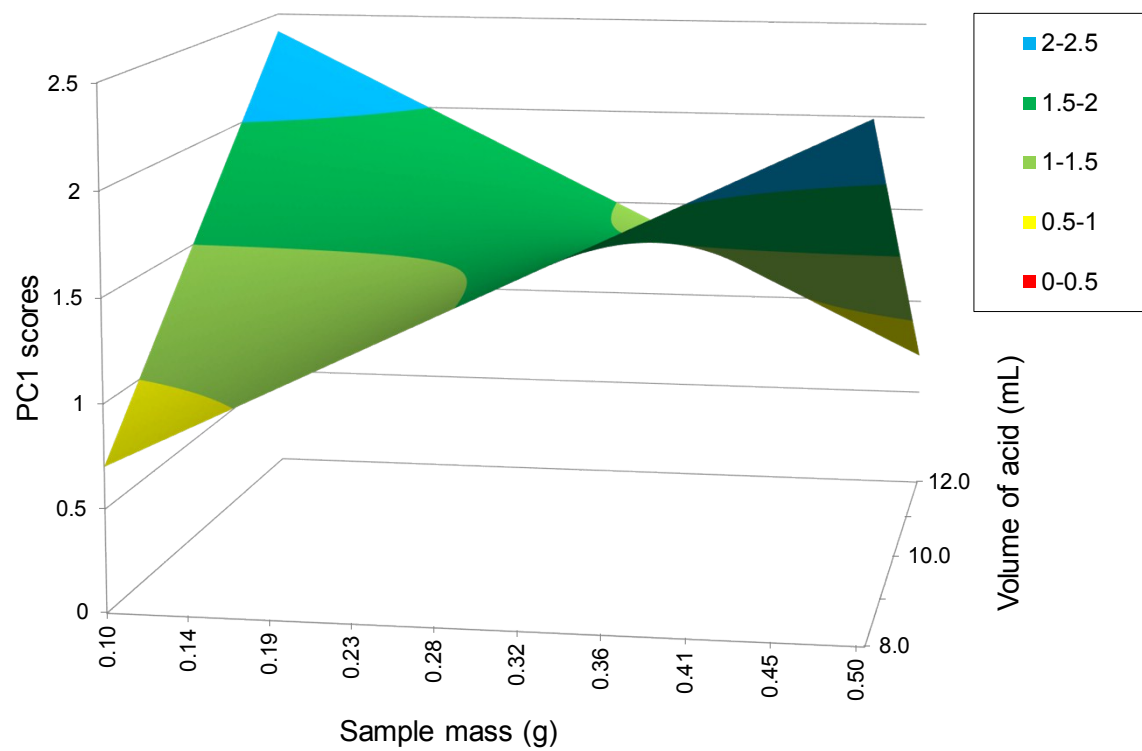

**Figure S2** Surface plot for optimized condition using inverted aqua regia (ARI).

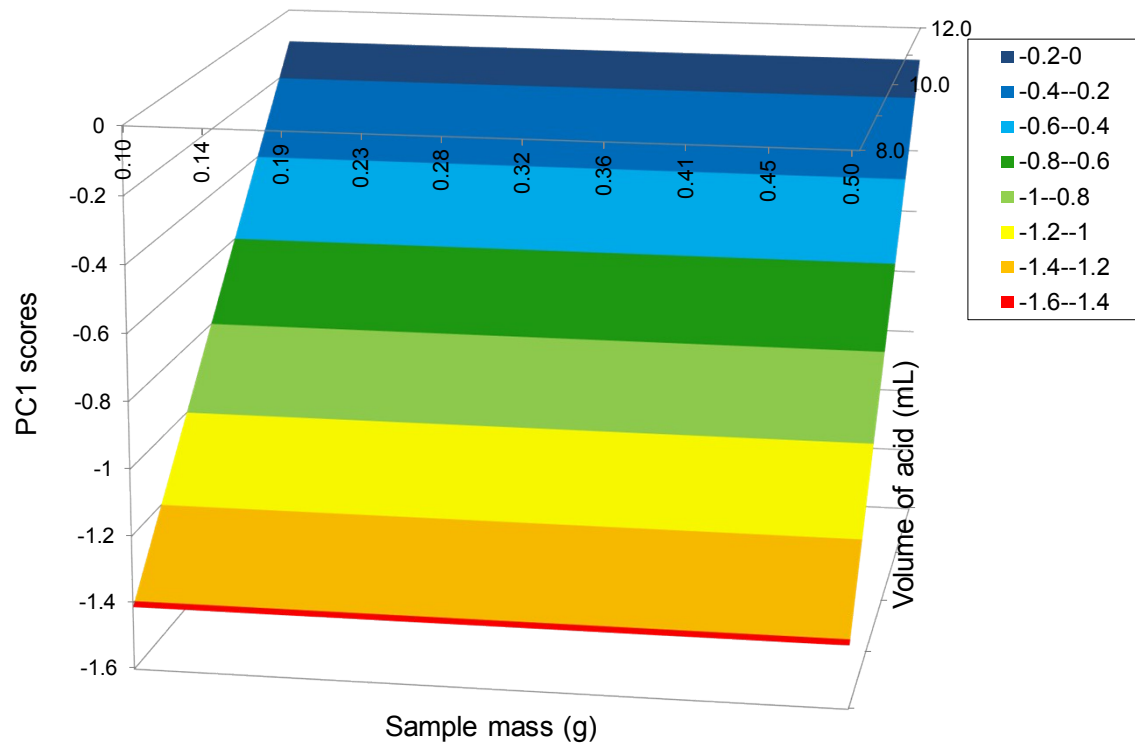

**Figure S3** Surface plot for optimized condition using HNO<sub>3</sub>.

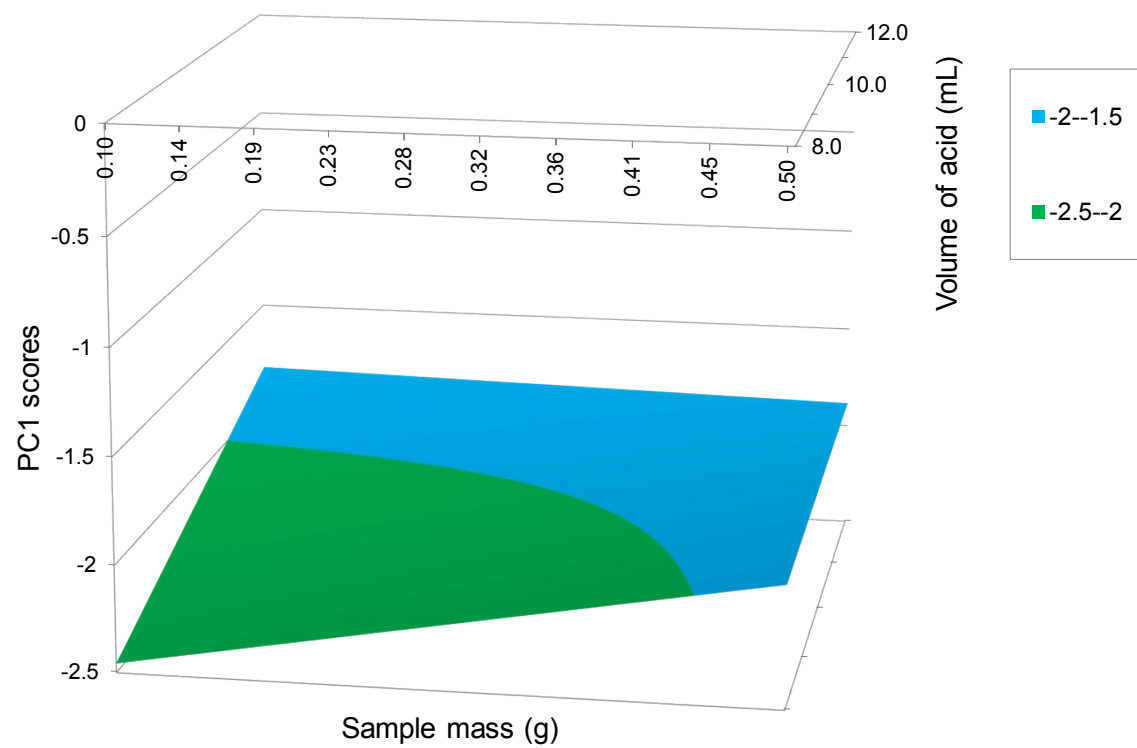



**Figure S4** Surface plot for optimized condition using HNO<sub>3</sub> 50% v/v.

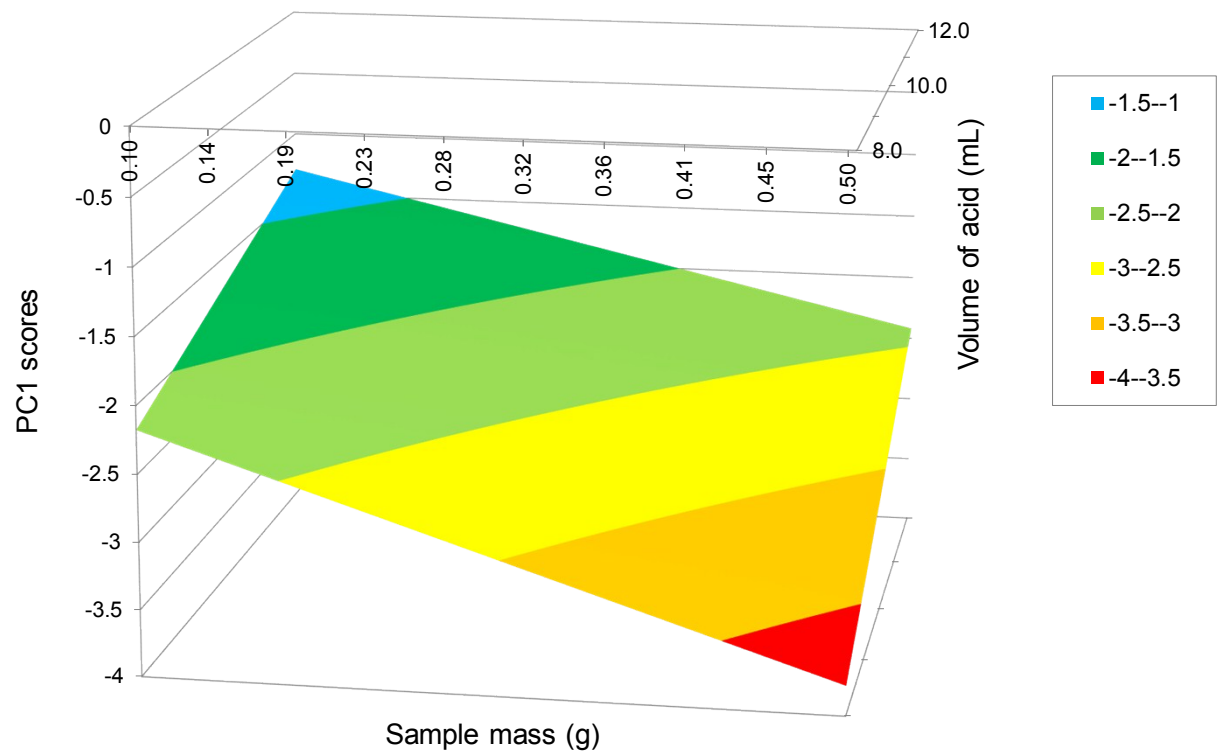

Supplement: c9ja00283a1.pdf [file c9ja00283a1.pdf]
